# Supplementary material for: Promising probiotic-fermented soymilk for alleviating acute diarrhea: insights into the microbiome and metabolomics
Source: Royal Society of Chemistry journal article supplement (doi:10.1039/d3fo05690b), 2024-01-01

## Supplementary Material

**Table S6:** Physicochemical factors of fermented soymilk

| Content                          | NFSM                     | FSM3                      | FSM4                      |
|----------------------------------|--------------------------|---------------------------|---------------------------|
| Oil absorption capacity (g/100g) | 8.28±0.70 <sup>a</sup>   | 8.43±0.12 <sup>a</sup>    | 8.59±0.10 <sup>a</sup>    |
| Moisture content (g/100g)        | 9.53±0.00 <sup>a</sup>   | 8.87±0.00 <sup>b</sup>    | 8.87±0.00 <sup>b</sup>    |
| Viscosity (cP)                   | 117.60±0.14 <sup>a</sup> | 426.80± 0.42 <sup>b</sup> | 466.80± 0.42 <sup>c</sup> |
| Water holding capacity (mg/g)    | 49.00±0.07 <sup>b</sup>  | 58.50±0.07 <sup>a</sup>   | 57.50±0.07 <sup>a</sup>   |

Note: NFSM: non-fermented soymilk, FSM3; fermented soymilk at 37 °C, NFSM4; fermented soymilk at 42 °C, cP/s: centipoise per second. The different bar alphabets represent statistically significant differences ( $p < 0.05$ ).

**Table S7:** Change of amino acids content in fermented soymilk samples

| Free amino acids | Mass concentration (mg/mL) |       |       |
|------------------|----------------------------|-------|-------|
|                  | NFSM                       | FSM3  | FSM4  |
| NEAA             |                            |       |       |
| Tyrosine         | 0.022                      | 0.026 | 0.036 |
| Aspartic acid    | 0.077                      | 0.088 | 0.086 |
| Serine           | 0.035                      | 0.037 | 0.043 |
| Glutamate        | 0.042                      | 0.071 | 0.087 |
| Glycine          | 0.028                      | 0.035 | 0.041 |
| Alanine          | 0.024                      | 0.026 | 0.026 |
| EAA              |                            |       |       |
| Tyrosine         | 0.022                      | 0.026 | 0.036 |
| Histidine *      | 0.006                      | 0.008 | 0.009 |
| Isoleucine *     | 0.020                      | 0.029 | 0.031 |
| Leucine *        | 0.050                      | 0.062 | 0.076 |
| Threonine *      | 0.027                      | 0.038 | 0.052 |
| Lysine *         | 0.048                      | 0.035 | 0.059 |
| Phenylalanine *  | 0.031                      | 0.058 | 0.068 |

Note: "\*" means essential amino acids (EAA). NFSM; non-fermented soymilk, FSM3; fermented soymilk at 37 °C, NFSM4; fermented soymilk at 42 °C. EAA: Essential amino acids, NEAA: Non-essential amino acids.

**Figure S5:** Changes in protein, soluble solids, carbohydrates, small peptides, and lipids during the fermentation

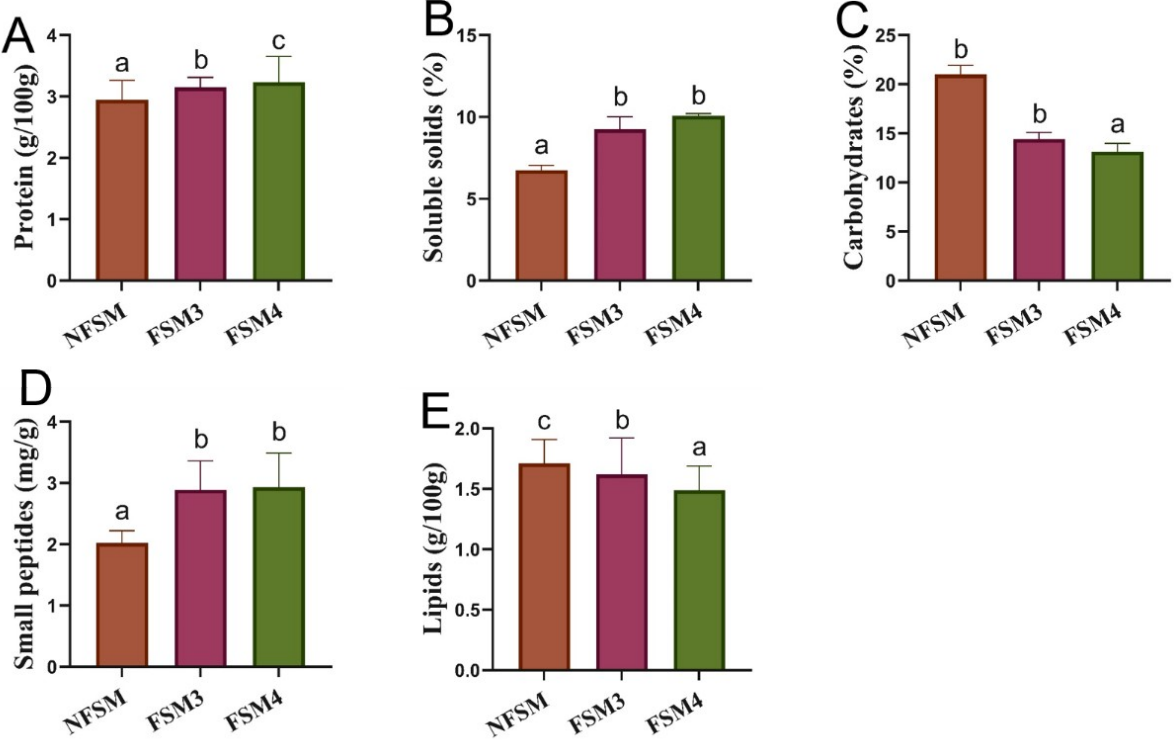

**Figure S6:** Changes in anti-nutrient factors during fermented soymilk

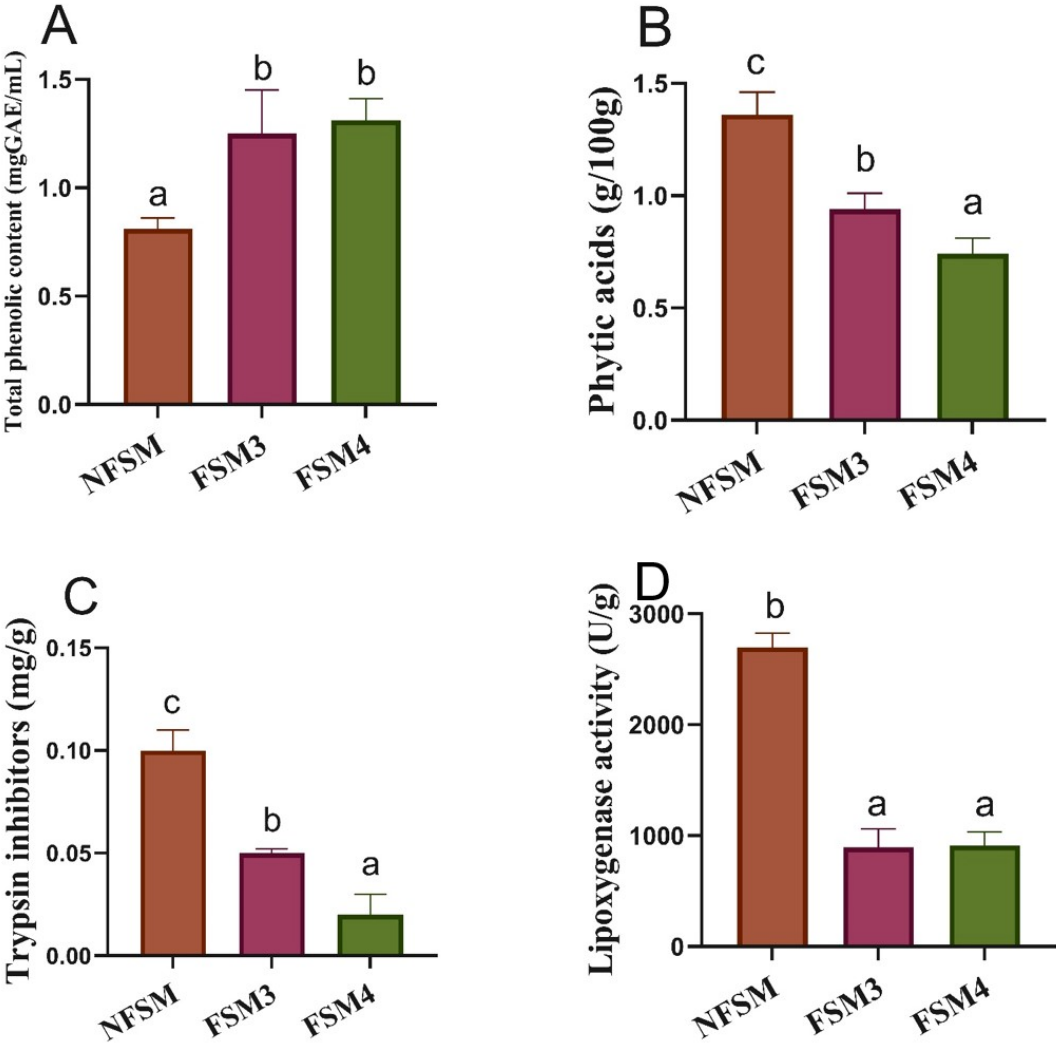

**Figure S7:** Isoflavone contents in lactic acid bacteria-fermented soymilk

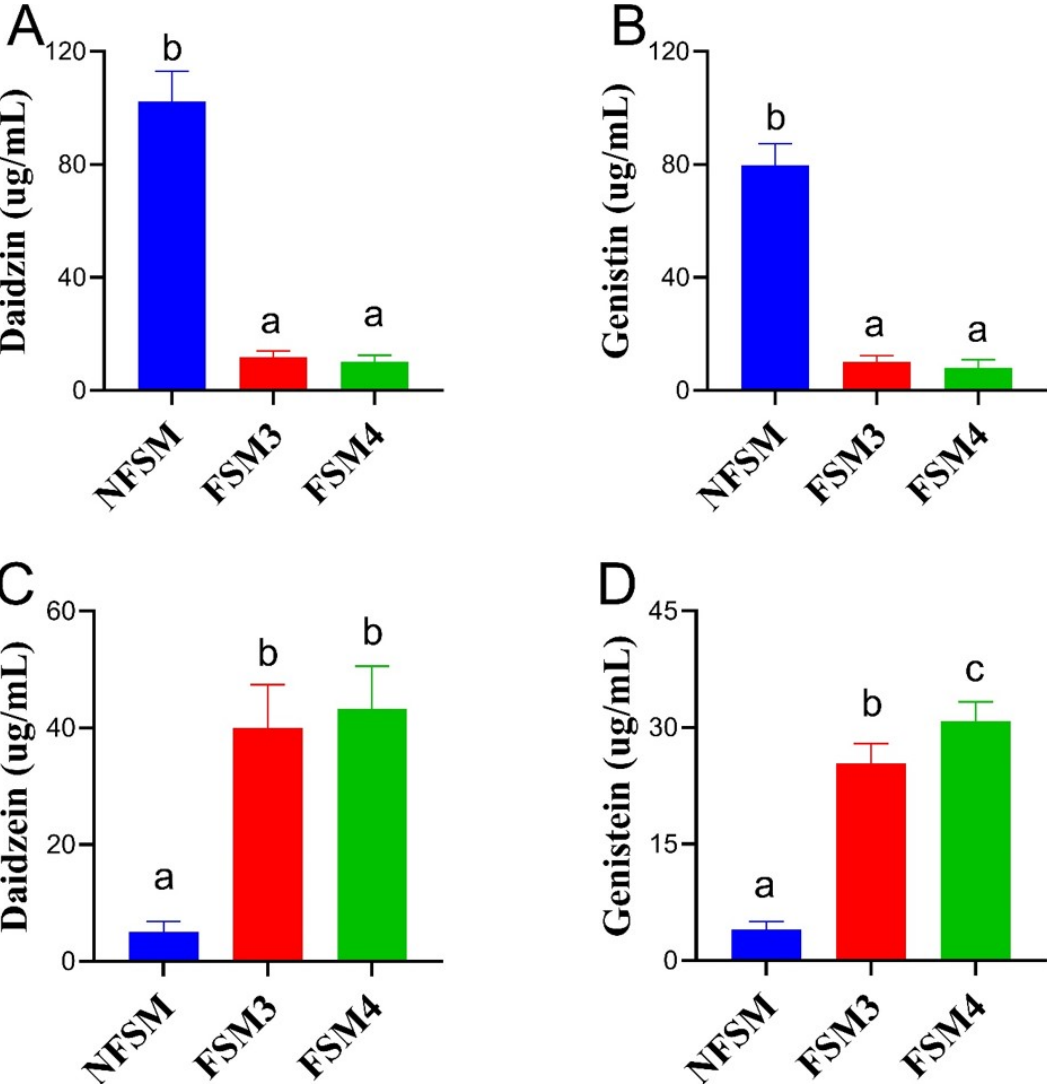

**Figure S8:** Different organic acids contents in fermented soymilk. NFSM; non-fermented soymilk, FSM3; fermented soymilk at 37 °C, NFSM4; fermented soymilk at 42 °C.

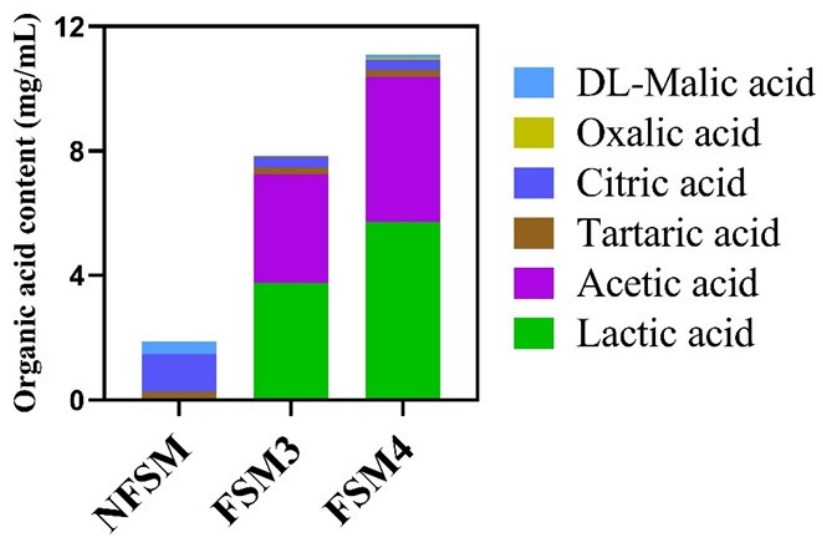

**Figure S9:** Different characteristics of volatile compounds in fermented soymilk

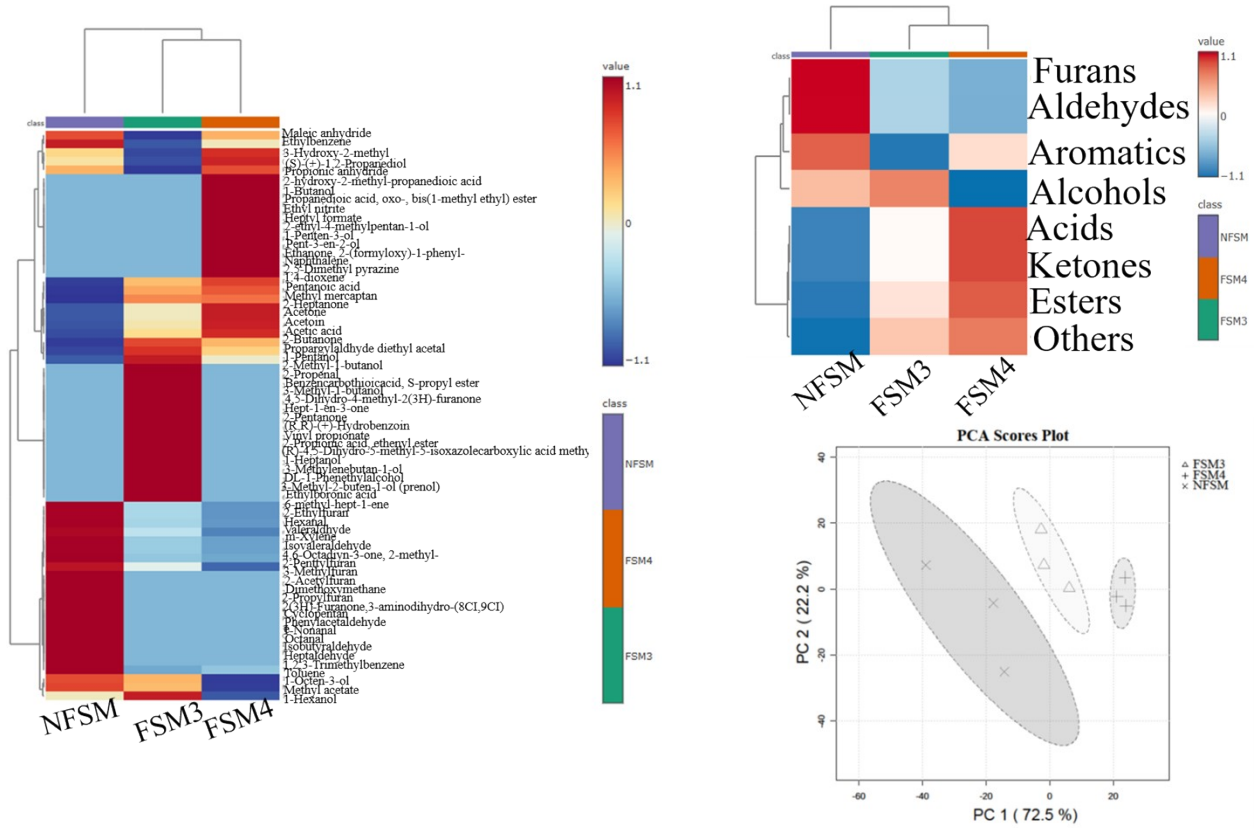

**Figure S10:** Effects of lactic acid bacteria-fermented soymilk on antioxidant capacity

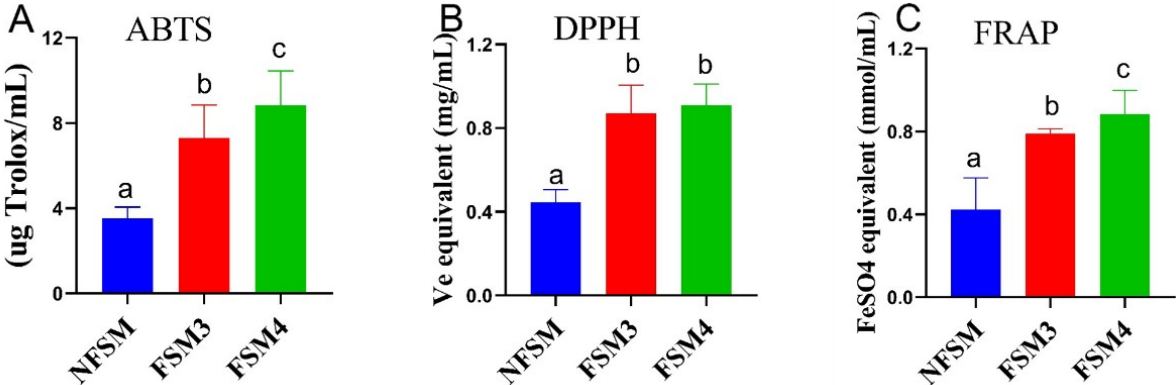

Supplement: d3fo05690b5.pdf [file d3fo05690b5.pdf]
