# Supplementary material for: Promising probiotic-fermented soymilk for alleviating acute diarrhea: insights into the microbiome and metabolomics
Source: Royal Society of Chemistry journal article supplement (doi:10.1039/d3fo05690b), 2024-01-01
Supplement: d3fo05690b1.pdf [file d3fo05690b1.pdf]

## Supplementary Material

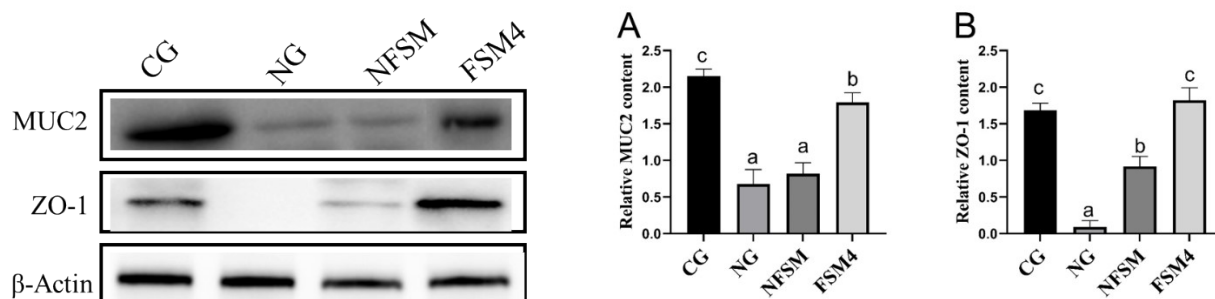

**Fig. S2.** FSM4 protected against PEG3350-induced intestinal barrier dysfunction. (A) Relative protein expression of MUC2; (B) Relative protein expression of ZO-1. Data were expressed as mean  $\pm$  SD ( $n = 3$ ). The different bar alphabets represent statistically significant differences ( $p < 0.05$ ).

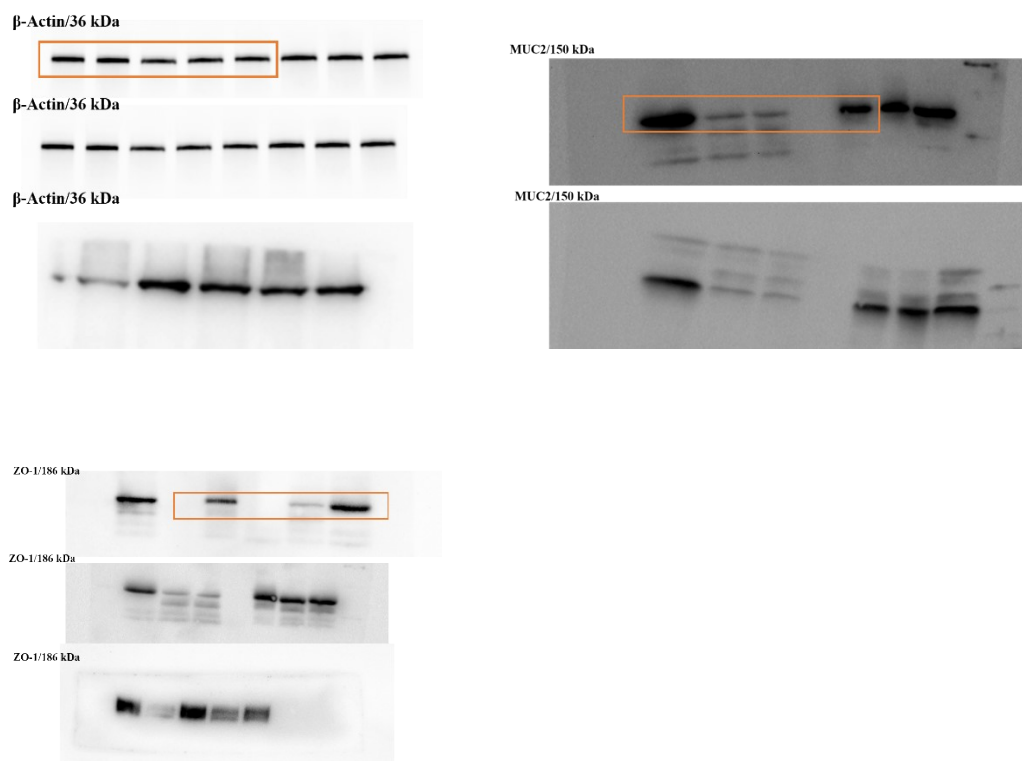

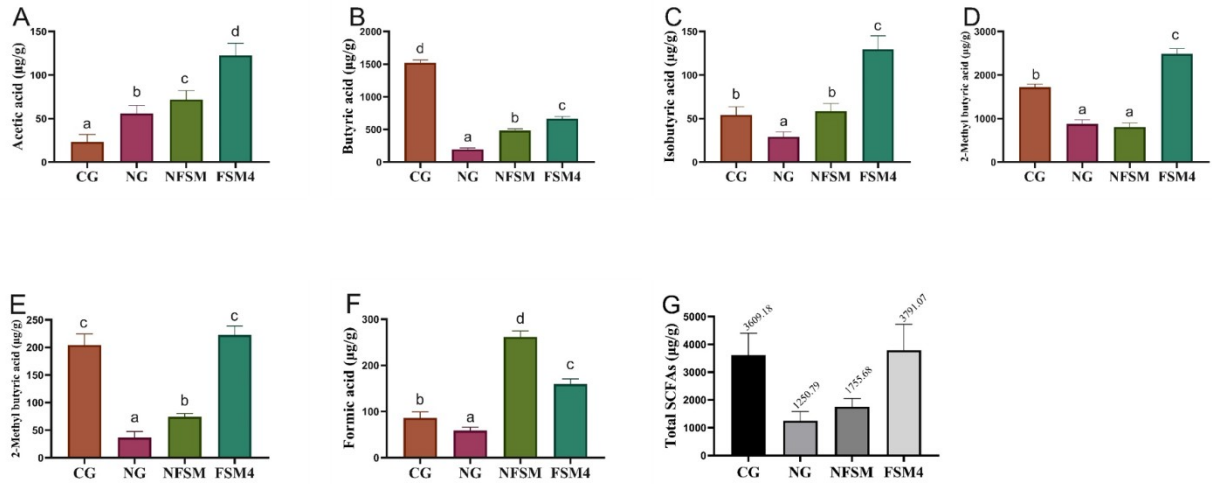

**Fig. S3.** Concentration of SCFAs in the colon of rats treated by fermented soymilk during PEG-induced acute diarrhea. (A) Acetic acid content, (B) Butyric acid, (C) isobutyric acid, (D) 2- Methyl butyric acid, (E) Valeric acid, (F) formic acid. Data were expressed as mean  $\pm$  SD (n = 8). The different bar alphabets represent statistically significant differences ( $p < 0.05$ ).

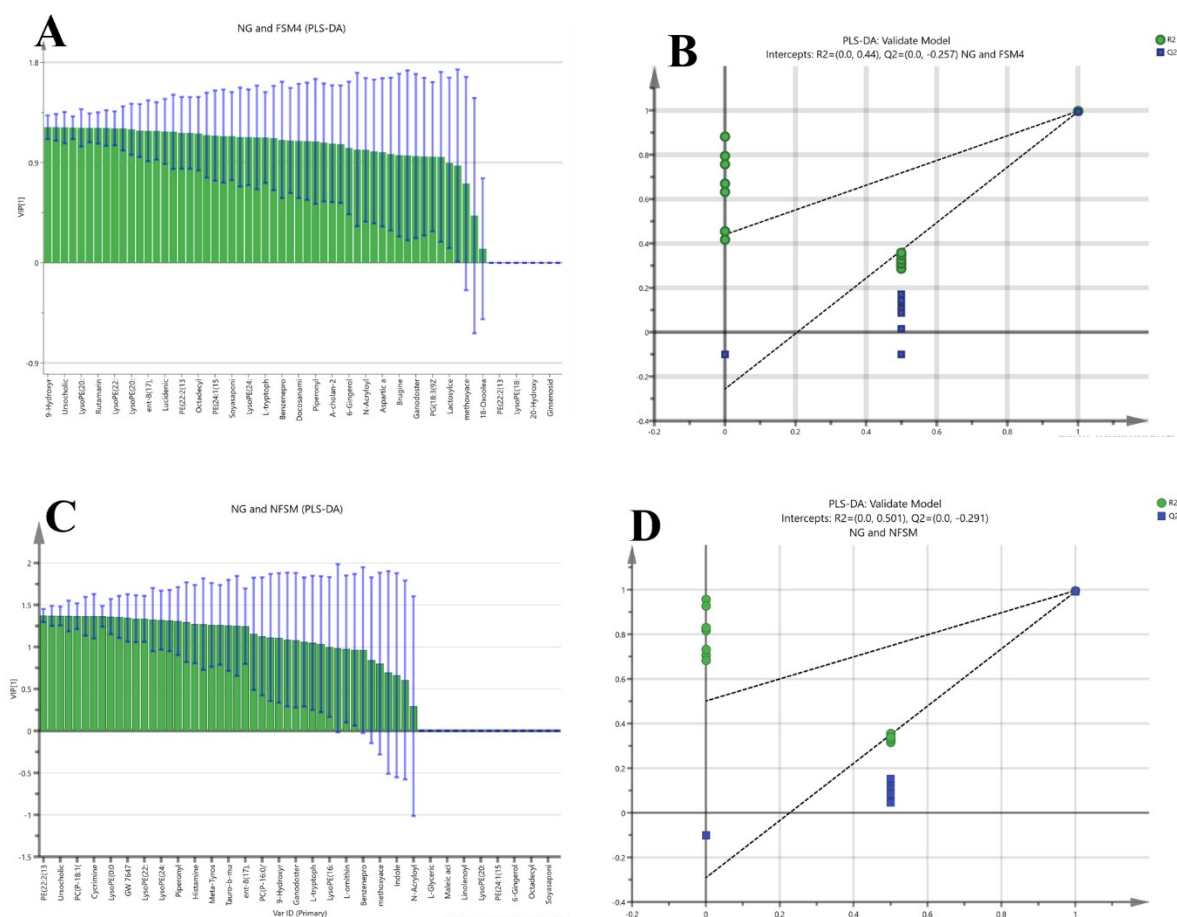

**Fig. S4.** The permutation and Variable importance in projection (VIP) tests based on the PLS-DA model. The permutation test based on the PLS-DA model between NG and FSM4 groups (A) and between NG and NFSM groups in (C). VIP test based on the PLS-DA model between NG and FSM4 groups (B) and between NG and NFSM groups in (D).
