# Supplementary material for: Promising probiotic-fermented soymilk for alleviating acute diarrhea: insights into the microbiome and metabolomics
Source: Royal Society of Chemistry journal article supplement (doi:10.1039/d3fo05690b), 2024-01-01
Supplement: d3fo05690b2.pdf [file d3fo05690b2.pdf]

### Supplementary Material

|              | Ingredients                           | Ratio (g/kg) |
|--------------|---------------------------------------|--------------|
| 1            | Corn                                  | 280          |
| 2            | Flour                                 | 360          |
| 3            | Soybean meal                          | 160          |
| 4            | Fish meal                             | 50           |
| 5            | Soybean                               | 25           |
| 6            | Soybean oil                           | 22           |
| 7            | Yeast powder                          | 8            |
| 8            | Sommon herbal<br>(Shoumingcao) powder | 5            |
| 9            | Bran                                  | 30           |
| 10           | Premix                                | 60           |
| <b>Total</b> |                                       | <b>1000</b>  |

**Table S1:**  
 The ingredients and ratio of the normal diet

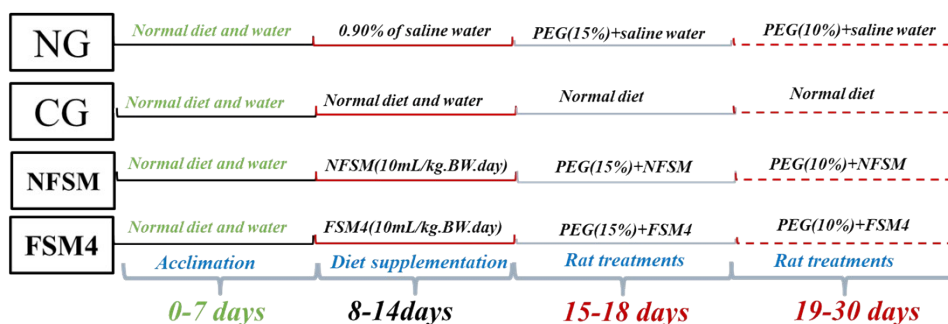

**Fig. S1.** Schematic experimental illustrating the protocol of the effect of fermented soymilk on acute diarrhea in rats.

**Table S2:** Relative abundance at the family and genus levels

| Phylum level    |          |          |          |          |
|-----------------|----------|----------|----------|----------|
| ID              | CG       | NG       | NFSM     | FSM4     |
| Bacteroidetes   | 0.482995 | 0.557848 | 0.626866 | 0.589125 |
| Firmicutes      | 0.499597 | 0.28846  | 0.278891 | 0.297853 |
| Verrucomicrobia | 0.000838 | 0.066245 | 0.059536 | 0.090916 |
| Proteobacteria  | 0.012806 | 0.045156 | 0.033622 | 0.020923 |
| Actinobacteria  | 0.001906 | 0.00059  | 0.000564 | 0.000513 |
| Cyanobacteria   | 0        | 0.001247 | 0.00013  | 2.43E-05 |
| Tenericutes     | 0.000916 | 0        | 0        | 0        |
| Fusobacteria    | 4.46E-06 | 5.67E-05 | 0        | 4.31E-05 |
| Deferribacteres | 3.97E-05 | 0        | 0        | 0        |
| Chloroflexi     | 1.56E-05 | 1.17E-05 | 0        | 5.28E-06 |
| Others          | 0.000882 | 0.000385 | 0.000391 | 0.000598 |

  

| Genus level                   |          |          |          |          |
|-------------------------------|----------|----------|----------|----------|
| ID                            | CG       | NG       | NFSM     | FSM4     |
| Bacteroides                   | 0.198412 | 0.543932 | 0.605682 | 0.551598 |
| Muribaculaceae                | 0.255243 | 4.56E-05 | 3.10E-06 | 4.91E-05 |
| Akkermansia                   | 0.000831 | 0.066245 | 0.059536 | 0.090916 |
| Lactobacillus                 | 0.134214 | 0.008543 | 0.023371 | 0.034974 |
| Lachnoclostridium             | 0.003697 | 0.049609 | 0.063367 | 0.054712 |
| Phascolarctobacterium         | 0        | 0.011129 | 0.039579 | 0.049409 |
| Lachnospiraceae_NK4A136_group | 0.092231 | 0.002538 | 0.000963 | 0.002926 |
| Parabacteroides               | 0.009944 | 0.017683 | 0.016971 | 0.020706 |
| [Ruminococcus]_gnavus_group   | 0        | 0.034238 | 0.013451 | 0.014633 |
| Anaerofilum                   | 5.65E-05 | 0.051004 | 0.005216 | 0.000349 |
| Others                        | 0.305371 | 0.215033 | 0.171862 | 0.189729 |
