# Supplementary material for: Promising probiotic-fermented soymilk for alleviating acute diarrhea: insights into the microbiome and metabolomics
Source: Royal Society of Chemistry journal article supplement (doi:10.1039/d3fo05690b), 2024-01-01
Supplement: d3fo05690b4.pdf [file d3fo05690b4.pdf]

## Supplementary Material

**Table S4:** Different serum metabolite compounds between NG and NFSM groups.

| Retention | Metabolite compounds                    | Mass     | Ionization | HMDB        | PubChem  |
|-----------|-----------------------------------------|----------|------------|-------------|----------|
| 6.58      | Ursocholic acid                         | 408.2883 | Esi+       | HMDB0000917 | 122340   |
| 5.038     | Tauro-b-muricholic acid                 | 515.2919 | Esi+       | HMDB0000932 | 21124703 |
| 0.83      | 3-(Carboxymethylamino) propanoic acid   | 147.0525 | Esi+       | HMDB0033550 | 281622   |
| 0.799     | Caffeoyl aspartic acid                  | 295.0688 | Esi+       | HMDB0029294 | 2489136  |
| 8.671499  | LysoPE(0:0/18:0)                        | 481.315  | Esi+       | HMDB0011129 | 53480667 |
| 7.929     | LysoPE(0:0/16:0)                        | 453.2853 | Esi+       | HMDB0011473 | 53480922 |
| 8.2275    | LysoPE(18:1(11Z)/0:0)                   | 479.3013 | Esi+       | HMDB0011505 | 53480949 |
| 8.191     | LysoPE(20:2(11Z,14Z)/0:0)               | 505.3172 | Esi+       | HMDB0011513 | 52925140 |
| 9.9655    | LysoPE(20:0/0:0)                        | 509.3467 | Esi+       | HMDB0011511 | 52925131 |
| 8         | LysoPE(22:4(7Z,10Z,13Z,16Z)/0:0)        | 529.3174 | Esi+       | HMDB0011523 | 52925133 |
| 8.988501  | LysoPE(20:1(11Z)/0:0)                   | 507.3319 | Esi+       | HMDB0011512 | 52925139 |
| 8.063     | LysoPE(24:6(6Z,9Z,12Z,15Z,18Z,21Z)/0:0) | 553.3167 | Esi+       | HMDB0011529 | 53480958 |
| 8.741     | PE(22:2(13Z,16Z)/16:1(9Z))              | 769.5593 | Esi+       | HMDB0009551 | 52924779 |
| 4.405333  | PG(18:3(9Z,12Z,15Z)/18:3(9Z,12Z,15Z))   | 766.48   | Esi+       | HMDB0010682 | 52927243 |
| 17.402    | PC(P-16:0/18:3(9Z,12Z,15Z))             | 740.559  | Esi+       | HMDB0011213 | 52923894 |
| 17.414    | PC(P-18:1(9Z)/18:4(6Z,9Z,12Z,15Z))      | 764.5614 | Esi+       | HMDB0011313 | 53480809 |
| 8.741     | PE(22:2(13Z,16Z)/14:0)                  | 769.5593 | Esi+       | HMDB0009547 | 52924774 |
| 7.63      | LysoPE(16:1(9Z)/0:0)                    | 451.2699 | Esi+       | HMDB0011504 | 52925129 |
| 8.67      | PS(18:0/18:0)                           | 791.5648 | Esi+       | HMDB0012378 | 9547096  |
| 5.208     | 20-Hydroxy-PGF2a                        | 370.2358 | Esi+       | HMDB0004049 | 53477777 |
| 13.3955   | Rutamarin                               | 356.1622 | Esi+       | HMDB0030666 | 26948    |
| 11.432    | Cycrimine                               | 287.2257 | Esi+       | HMDB0015077 | 2911     |
| 9.22025   | Indole                                  | 459.388  | Esi+       | HMDB0000738 | 798      |
| 0.872     | Benzenepropanenitrile                   | 131.0737 | Esi+       | HMDB0034236 | 12581    |
| 6.197     | Docosanamide                            | 339.3499 | Esi+       | HMDB0000583 | 76468    |
| 1.53      | L-ornithine                             | 132.161  | Esi+       | HMDB0000214 | 6262     |
| 1.0875    | N-Acryloylglycine                       | 129.0425 | Esi+       | HMDB0001843 | 100321   |
| 0.821     | D-Alanine                               | 89.0479  | Esi+       | HMDB0001310 | 71080    |
| 8.724     | Histamine                               | 111.1451 | Esi+       | HMDB0000870 | 774      |
| 5.721     | 9-Hydroxyrisperidone                    | 426.208  | Esi+       | HMDB0015396 | 115237   |
| 8.799     | 2-HETE                                  | 320.2338 | Esi+       | HMDB0006111 | 5312983  |
| 5.32      | L-tryptophan                            | 204.2132 | Esi+       | HMDB0000929 | 6305     |
| 5.217     | Aspartic acid                           | 133.0375 | Esi+       | HMDB0000191 | 5960     |
| 1.73      | L-serine                                | 105.0532 | Esi+       | HMDB0000187 | 5951     |

**Table S5:** Different serum metabolite compounds between NG and FSM4 groups

| Retention | Metabolite compounds                  | Mass     | Ionization | HMDB        | PubChem  |
|-----------|---------------------------------------|----------|------------|-------------|----------|
| 6.58      | Ursocholic acid                       | 408.2883 | Esi+       | HMDB0000917 | 122340   |
| 1.08      | L-Glyceric acid                       | 106.0266 | Esi+       | HMDB0006372 | 6326776  |
| 5.038     | Tauro-b-muricholic acid               | 515.2919 | Esi+       | HMDB0000932 | 21124703 |
| 0.958     | Maleic acid                           | 116.0105 | Esi+       | HMDB0000176 | 444972   |
| 8.671499  | Caffeoyl aspartic acid                | 481.315  | Esi+       | HMDB0029294 | 24891369 |
| 8.671499  | LysoPE(0:0/18:0)                      | 481.315  | Esi+       | HMDB0011129 | 53480667 |
| 7.929     | LysoPE(0:0/16:0)                      | 453.2853 | Esi+       | HMDB0011473 | 53480922 |
| 8.2275    | LysoPE(18:1(11Z)/0:0)                 | 479.3013 | Esi+       | HMDB0011505 | 53480949 |
| 8.1915    | LysoPE(20:2(11Z,14Z)/0:0)             | 505.3172 | Esi+       | HMDB0011513 | 52925140 |
| 9.9655    | LysoPE(20:0/0:0)                      | 509.3467 | Esi+       | HMDB0011511 | 52925131 |
| 8.0805    | LysoPE(22:4(7Z,10Z,13Z,16Z)/0:0)      | 529.3166 | Esi+       | HMDB0011523 | 52925133 |
| 8.988501  | LysoPE(20:1(11Z)/0:0)                 | 507.3319 | Esi+       | HMDB0011512 | 52925139 |
| 8.741     | PE(22:2(13Z,16Z)/16:1(9Z))            | 769.5593 | Esi+       | HMDB0009551 | 52924779 |
| 4.405333  | PG(18:3(9Z,12Z,15Z)/18:3(9Z,12Z,15Z)) | 766.48   | Esi+       | HMDB0010682 | 52927243 |
| 17.402    | PC(P-16:0/18:3(9Z,12Z,15Z))           | 740.559  | Esi+       | HMDB0011213 | 52923894 |
| 17.414    | PC(P-18:1(9Z)/18:4(6Z,9Z,12Z,15Z))    | 764.5614 | Esi+       | HMDB0011313 | 53480809 |
| 8.67      | PS(18:0/18:0)                         | 791.5648 | Esi+       | HMDB0012378 | 9547096  |
| 8.934     | PI(20:0/16:0)                         | 866.5854 | Esi+       | HMDB0009866 | 52928286 |
| 6.165     | PE(24:1(15Z)/14:1(9Z))                | 771.5746 | Esi+       | HMDB0009746 | 53480018 |
| 17.455    | PE(20:2(11Z,14Z)/14:0)                | 715.5125 | Esi+       | HMDB0009283 | 52924574 |
| 6.937     | 6-Gingerol                            | 294.1831 | Esi+       | HMDB0005783 | 3473     |
| 17.44     | Lactosylceramide (d18:1/12:0)         | 805.5561 | Esi+       | HMDB0004866 | 52931260 |
| 9.22025   | Indole                                | 459.388  | Esi+       | HMDB0000738 | 798      |
| 6.197     | Docosanamide                          | 339.3499 | Esi+       | HMDB0000583 | 76468    |
| 1.53      | L-ornithine                           | 132.161  | Esi+       | HMDB0000214 | 6262     |
| 1.0875    | N-Acryloylglycine                     | 129.0425 | Esi+       | HMDB0001843 | 100321   |
| 8.724     | Histamine                             | 111.1451 | Esi+       | HMDB0000870 | 774      |
| 8.799     | 12-HETE                               | 320.2338 | Esi+       | HMDB0006111 | 5312983  |
| 0.855     | Cytidine                              | 243.0849 | Esi+       | HMDB0000089 | 6253     |
| 5.32      | L-tryptophan                          | 204.2132 | Esi+       | HMDB0000929 | 6305     |
| 5.217     | Aspartic acid                         | 133.0375 | Esi+       | HMDB0000191 | 5960     |
| 1.73      | L-serine                              | 105.0532 | Esi+       | HMDB0000187 | 5951     |
